# Supplementary material
Source: publisher figshare collection journal article supplement (https://karger.figshare.com/ndownloader/files/8709061)

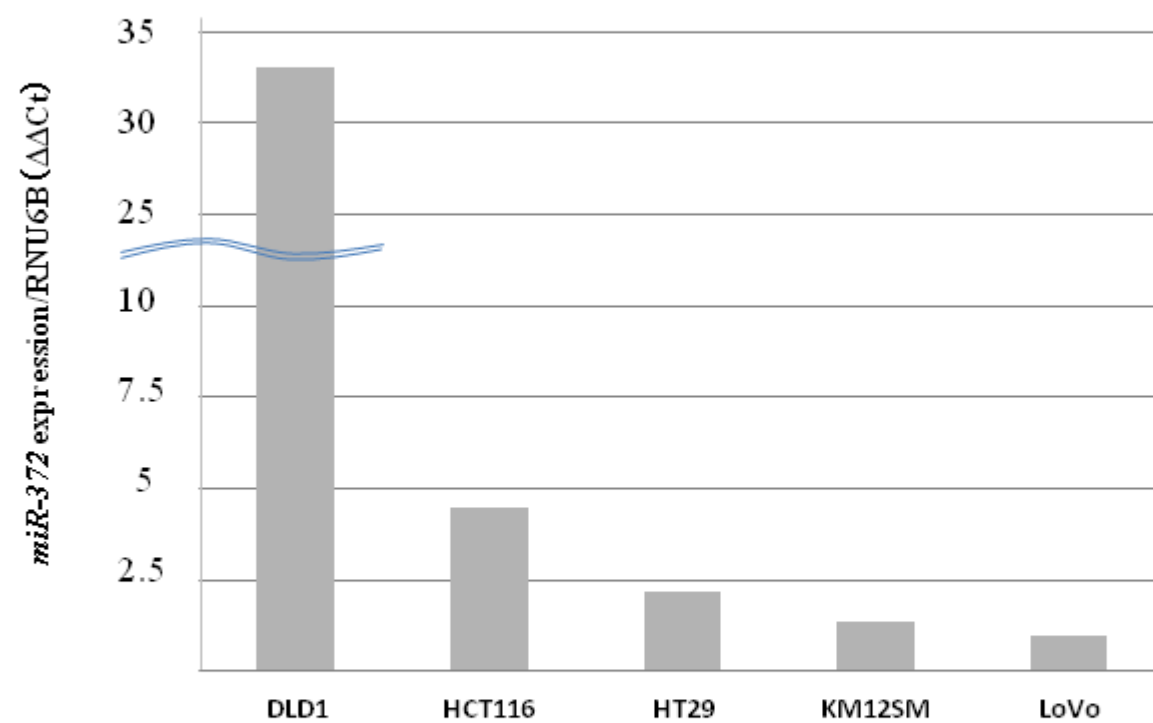

**Supplementary Figure 1.**

Supplement: Supplementary file 1 [file 8709061]
